# Supplementary material for: High-throughput testing in head and neck squamous cell carcinoma identifies agents with preferential activity in human papillomavirus-positive or negative cell lines
Source: PubMed Central journal article supplement (PMC5995257; doi:10.18632/oncotarget.25436), 2018-05-25
Supplement: oncotarget-09-26064-s001.pdf [file oncotarget-09-26064-s001.pdf]

# High-throughput testing in head and neck squamous cell carcinoma identifies agents with preferential activity in human papillomavirus-positive or negative cell lines

## SUPPLEMENTARY MATERIALS

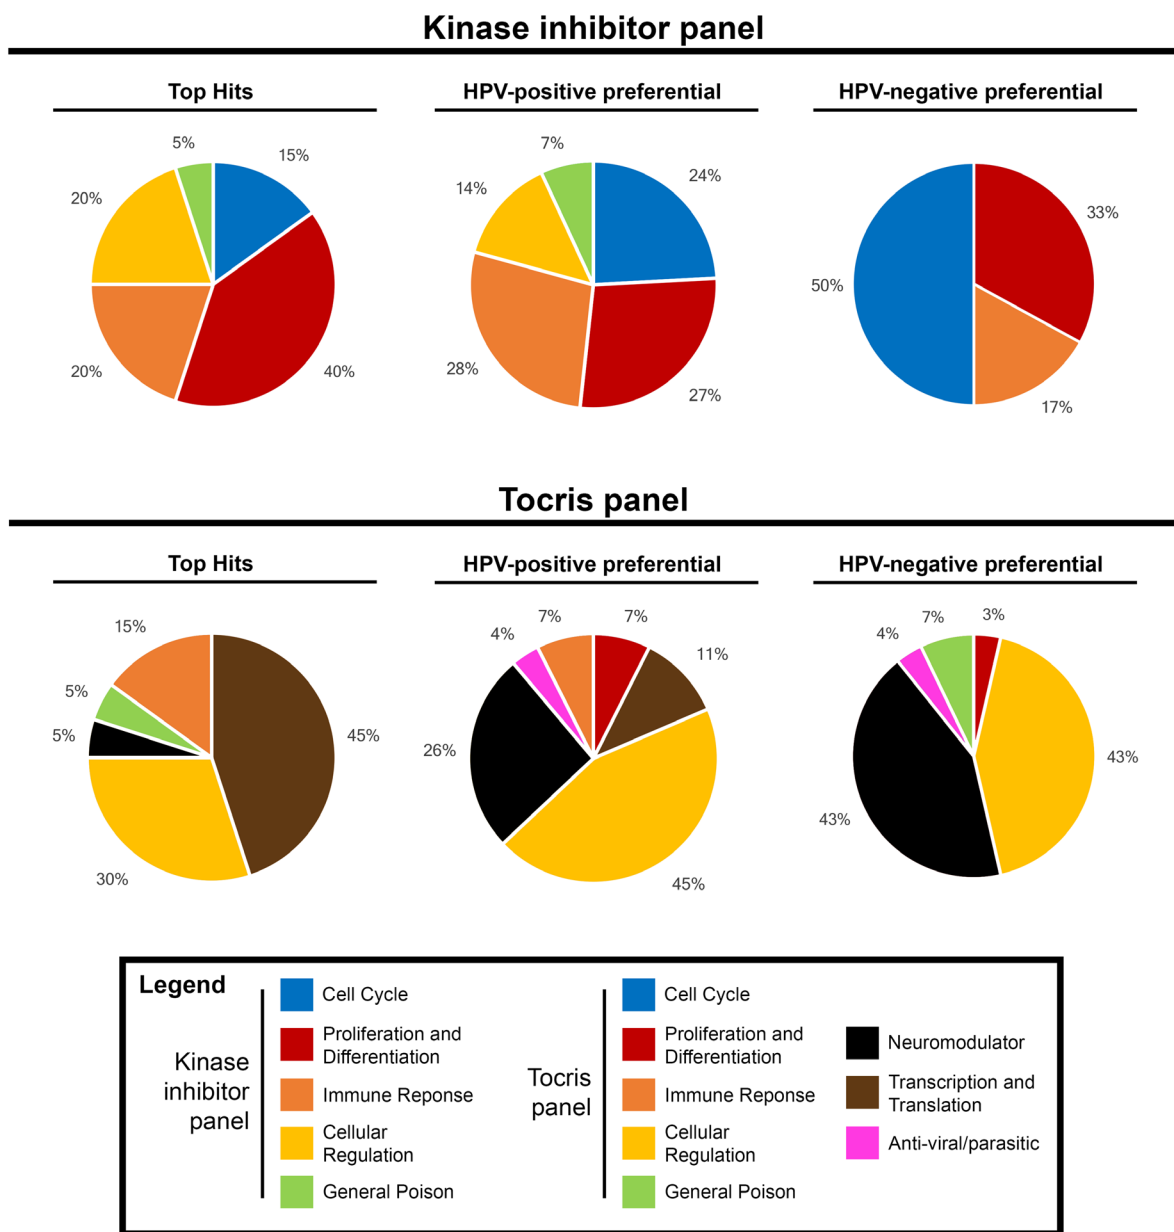

Supplementary Figure 1: Compounds identified as top hits in potency, preferential activity against HPV-positive and preferential activity against HPV-negative cell lines using the Kinase inhibitor and Tocris panels grouped by their mechanism of action.

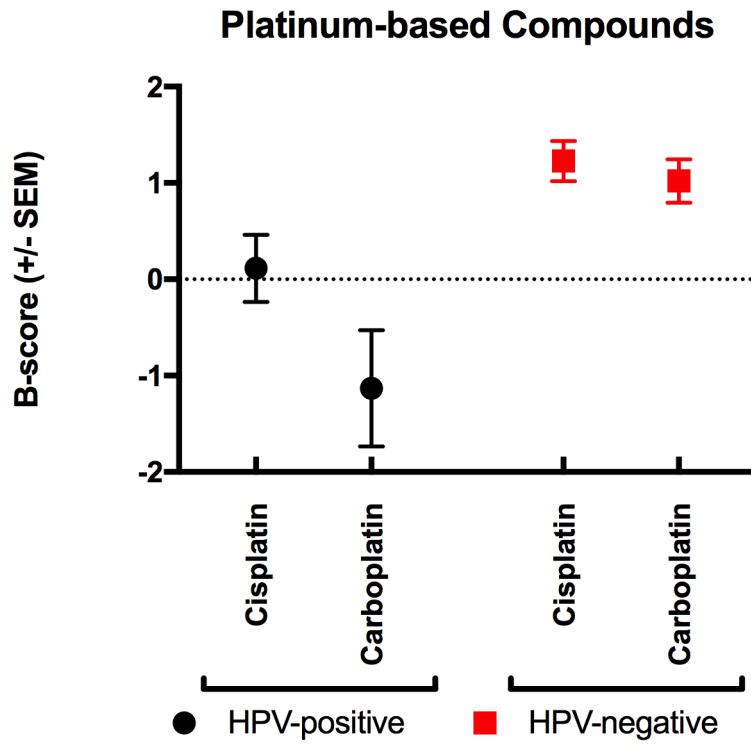

Supplementary Figure 2: Cisplatin and carboplatin, chemotherapeutics in routine use head and neck cancer, were included in the compound panels, but did not meet the set criteria for significant activity (B-score < -2) at a dose of 4 $\mu$ M.

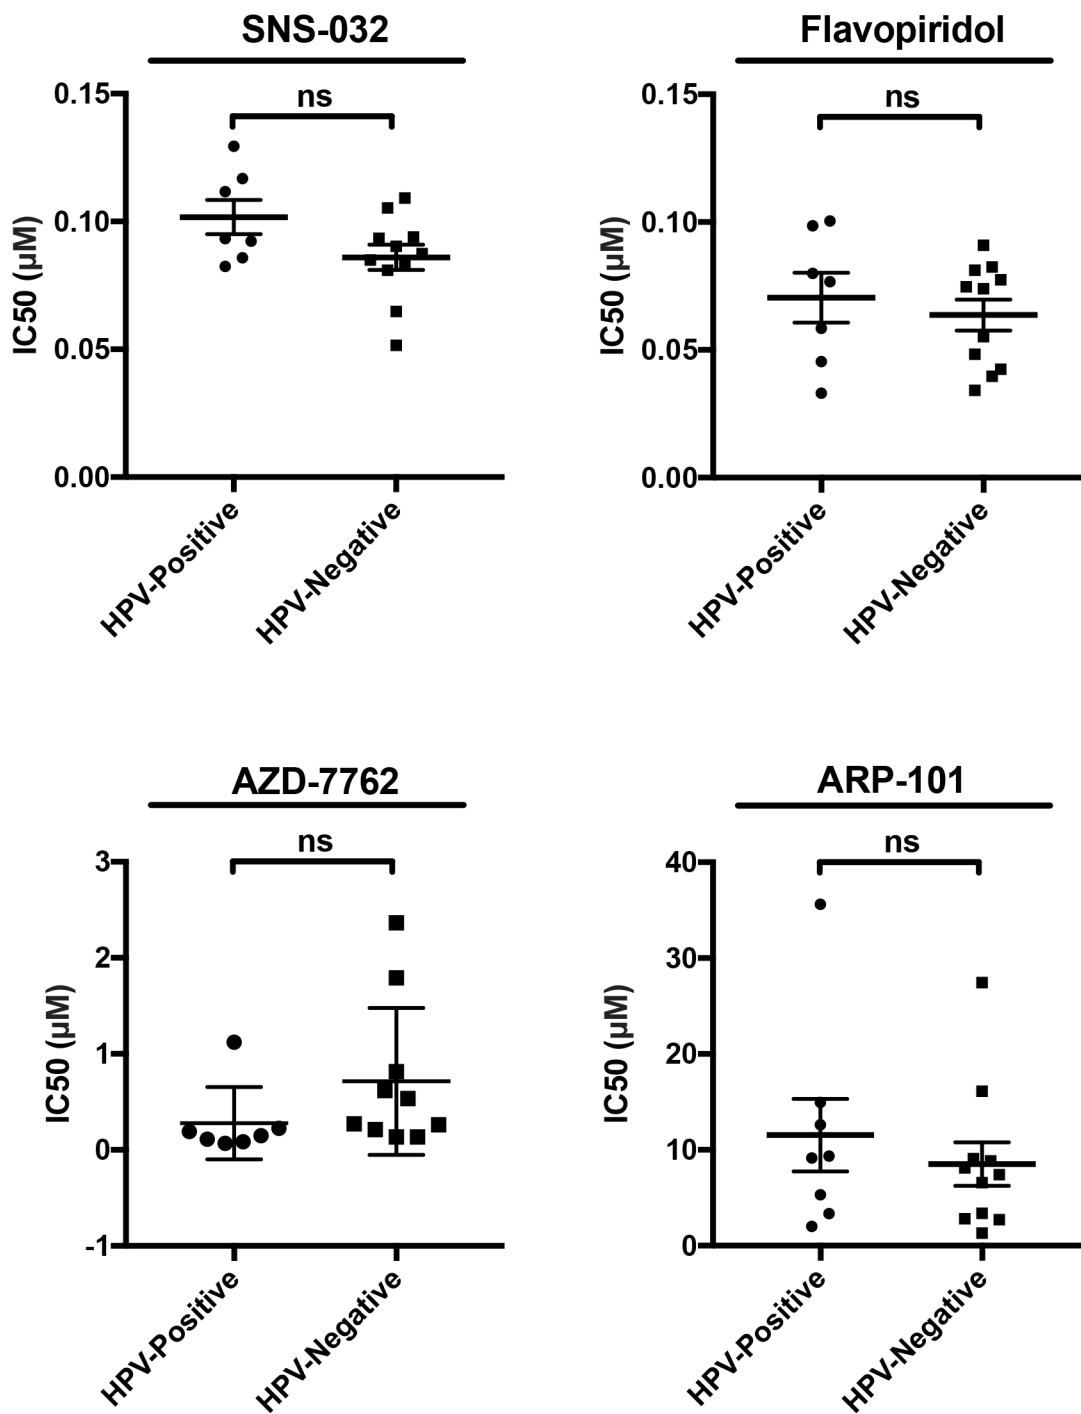

Supplementary Figure 3: Validation studies on SNS-032, Flavopiridol, AZD-7762 and ARP-101 did not reveal significantly selective potency against HNSCC cell lines stratified by HPV status ( $p=0.07$ ,  $0.54$ ,  $0.19$  and  $0.48$  respectively). (ns = not significant).

**Supplementary Table 1: Top 20 compounds with highest potency from the kinase inhibitor and tocris panels against HNSCC cell lines**

| Compound                                               | All Cell lines |      | Primary mechanism of action                                               | Category                         |
|--------------------------------------------------------|----------------|------|---------------------------------------------------------------------------|----------------------------------|
|                                                        | Mean           | SEM  |                                                                           |                                  |
| <b>Top 20 overall Hits from Kinase Inhibitor Panel</b> |                |      |                                                                           |                                  |
| Staurosporine                                          | -4.66          | 0.46 | Non-selective protein kinase inhibitor                                    | General Poison                   |
| TCS 2312 dihydrochloride                               | -3.73          | 0.54 | Potent Chk1 inhibitor                                                     | Cell Cycle                       |
| GDC-0941 bismesylate                                   | -3.45          | 0.41 | Inhibitor of class I PI3 kinase                                           | Proliferation & Differentiation  |
| IMD 0354                                               | -3.36          | 0.33 | Inhibitor of IKK $\beta$                                                  | Immune Response                  |
| ER 27319 maleate                                       | -3.11          | 0.31 | Selective Syk kinase inhibitor                                            | Immune Response                  |
| IC261                                                  | -3.08          | 0.35 | Selective casein kinase 1 $\delta$ and 1 $\epsilon$ inhibitor             | Cellular Regulation              |
| Alsterpaullone                                         | -3.04          | 0.51 | Inhibitor of multiple CDKs                                                | Cell Cycle                       |
| BI 78D3                                                | -2.81          | 0.72 | Competitive JNK inhibitor                                                 | Immune Response                  |
| Dasatanib                                              | -2.72          | 0.56 | Inhibitor of Abl, Src and c-Kit                                           | Proliferation & Differentiation  |
| NVP-BEZ235                                             | -2.70          | 0.24 | Inhibitor of PI3K and mTOR                                                | Proliferation & Differentiation  |
| PIK-75                                                 | -2.64          | 0.52 | Inhibitor of p110 $\alpha$                                                | Proliferation & Differentiation  |
| A-443654                                               | -2.63          | 0.39 | Inhibitor of Akt                                                          | Proliferation & Differentiation  |
| TAE-684                                                | -2.48          | 0.51 | Inhibitor of ALK                                                          | Proliferation & Differentiation  |
| 5-Iodotubercidin                                       | -2.45          | 0.35 | Potent adenosine kinase inhibitor                                         | Cellular Regulation              |
| FAK Inhibitor 14                                       | -2.43          | 0.45 | Selective FAK inhibitor                                                   | Proliferation & Differentiation  |
| Ryuvidine                                              | -2.40          | 0.58 | Inhibitor of SETD8 and CDK4                                               | Cellular Regulation              |
| Lestaurtinib                                           | -2.31          | 0.23 | Inhibitor of JAK2, FLT3 and TrkA                                          | Immune Response                  |
| NVP-AEW541, AEW541                                     | -2.11          | 0.35 | Inhibitor of IGF-1R/InsR                                                  | Cellular Regulation              |
| SB-505124 hydrochloride hydrate                        | -2.06          | 0.67 | Inhibitor of ALK5                                                         | Proliferation & Differentiation  |
| NSC 663284                                             | -2.05          | 0.43 | Inhibitor of Cdc25 phosphatase                                            | Cell Cycle                       |
| <b>Top 20 Overall Hits from Tocris panel</b>           |                |      |                                                                           |                                  |
| Pyrrrolidinedithiocarbamate ammonium                   | -19.71         | 1.92 | Inhibits NF- $\kappa$ B, prevents increase in NOS mRNA                    | Immune Response                  |
| Daunorubicin hydrochloride                             | -16.78         | 1.53 | Inhibits topoisomerase II                                                 | Transcription and translation    |
| Actinomycin D                                          | -16.64         | 1.64 | Inhibits RNA polymerase                                                   | Transcription and translation    |
| SCS                                                    | -15.54         | 2.18 | Selective GABAA receptor antagonist                                       | Neuromodulators                  |
| NSC 146109 hydrochloride                               | -15.41         | 1.23 | activates p53-dependent transcription                                     | Transcription and translation    |
| Doxorubicin hydrochloride                              | -14.70         | 1.88 | Inhibits DNA topoisomerase II                                             | Transcription and translation    |
| Homoharringtonine                                      | -14.62         | 1.26 | Inhibitor of protein synthesis                                            | Transcription and translation    |
| A23187, free acid                                      | -14.34         | 1.49 | Calcium ionophore                                                         | General Poison                   |
| BNTX maleate                                           | -14.31         | 1.20 | Standard $\delta$ 1 selective antagonist                                  | Cellular regulation & physiology |
| MG 132                                                 | -13.67         | 1.32 | Inhibitor of Proteasome, calpain and NF- $\kappa$ B activation            | Immune Response                  |
| Brefeldin A                                            | -13.61         | 1.21 | Disrupts protein translocation to Golgi                                   | Transcription and translation    |
| Bay 11-7085                                            | -13.32         | 1.38 | Inhibitor of TNF- $\alpha$ -induced I $\kappa$ B $\alpha$ phosphorylation | Immune Response                  |
| Diphenyleiodonium chloride                             | -13.21         | 1.15 | GPR3 agonist; also inhibits NOS and NADPH oxidases                        | Cellular regulation & physiology |
| NSC 632839 hydrochloride                               | -13.11         | 1.11 | Inhibitor of ubiquitin isopeptidase activity                              | Cellular regulation & physiology |
| SN 38                                                  | -12.50         | 1.17 | Inhibitor of DNA topoisomerase I                                          | Transcription and translation    |
| Cycloheximide                                          | -12.14         | 1.16 | Inhibitor of protein synthesis                                            | Transcription and translation    |
| JTC 801                                                | -12.00         | 1.10 | Selective NOP antagonist                                                  | Cellular regulation & physiology |
| SCH 79797 dihydrochloride                              | -11.72         | 1.05 | Selective casein kinase 1 $\delta$ and 1 $\epsilon$ inhibitor             | Cellular regulation & physiology |
| Camptothecin                                           | -11.61         | 1.25 | DNA topoisomerase inhibitor                                               | Transcription and translation    |
| Cantharidin                                            | -11.56         | 1.17 | Inhibitor of Protein phosphatase 1/2A                                     | Cellular regulation & physiology |

**Supplementary Table 2: Complete list of kinase inhibitor panel and Tocris panel compound activity against individual HNSCC cell lines**

See Supplementary File 1

**Supplementary Table 3: Compounds with preferential activity against HPV-positive cell lines**

| Compound                                      | HPV-Positive |      | HPV-Negative |      | Difference   |      | Primary mechanism of action                                          | Category                          |
|-----------------------------------------------|--------------|------|--------------|------|--------------|------|----------------------------------------------------------------------|-----------------------------------|
|                                               | Mean B score | SEM  | Mean B score | SEM  | Mean B score | SEM  |                                                                      |                                   |
| <b>Kinase inhibitor Panel</b>                 |              |      |              |      |              |      |                                                                      |                                   |
| SNS-032, BMS387032                            | -5.26        | 0.57 | -0.10        | 0.64 | -5.16        | 0.29 | CDK 2 inhibitor                                                      | Cell Cycle                        |
| MK-1775                                       | -4.90        | 0.42 | -0.40        | 0.51 | -4.50        | 0.25 | Wee1 inhibitor                                                       | Cell Cycle                        |
| Flavopiridol                                  | -3.94        | 0.49 | -0.30        | 0.59 | -3.64        | 0.27 | CDK9 Kinase Inhibitor                                                | Cell Cycle                        |
| AZ-960                                        | -2.50        | 0.28 | 0.15         | 0.40 | -2.65        | 0.18 | JAK2 inhibitor                                                       | Immune Response                   |
| Merck-5, Mk-5                                 | -2.90        | 0.29 | -0.41        | 0.37 | -2.49        | 0.17 | JAK kinase family inhibitor                                          | Immune Response                   |
| AZD-7762 hydrochloride                        | -3.29        | 0.35 | -0.82        | 0.33 | -2.47        | 0.15 | Chk1/2 inhibitor                                                     | Cell Cycle                        |
| AT9283                                        | -2.51        | 0.35 | -0.12        | 0.40 | -2.39        | 0.18 | JAK2/3 inhibitor                                                     | Immune Response                   |
| BMS-3                                         | -2.85        | 0.62 | -0.56        | 0.53 | -2.29        | 0.25 | LIMK inhibitor                                                       | Cellular Regulation               |
| KU0063794                                     | -2.62        | 0.58 | -0.46        | 0.39 | -2.16        | 0.20 | mTOR inhibitor                                                       | Proliferation & Differentiation   |
| SKF 86002 dihydrochloride                     | -2.38        | 0.86 | -0.33        | 0.25 | -2.05        | 0.21 | p38 MAP kinase inhibitor                                             | Immune Response                   |
| RDEA-119, AR-119                              | -2.98        | 0.89 | -1.16        | 0.30 | -1.82        | 0.23 | MEK1/2 inhibitor                                                     | Immune Response                   |
| GSK461364                                     | -2.02        | 0.77 | -0.24        | 0.27 | -1.78        | 0.19 | PLK1 inhibitor                                                       | Cell Cycle                        |
| GSK690693                                     | -2.19        | 0.41 | -0.53        | 0.21 | -1.66        | 0.12 | Akt 1/2/3 inhibitor                                                  | Proliferation & Differentiation   |
| Foretinib                                     | -2.28        | 0.79 | -0.65        | 0.48 | -1.63        | 0.26 | HGF receptor family tyrosine kinase inhibitor                        | Proliferation & Differentiation   |
| TWS119                                        | -2.67        | 0.44 | -1.14        | 0.42 | -1.53        | 0.20 | GSK-3 $\beta$ inhibitor                                              | Cellular Regulation               |
| PD 180970                                     | -2.43        | 0.17 | -0.96        | 0.46 | -1.47        | 0.19 | p210Bcr/Abl kinase inhibitor                                         | Proliferation & Differentiation   |
| BI 2536                                       | -3.00        | 0.98 | -1.56        | 0.20 | -1.43        | 0.22 | PLK1 inhibitor                                                       | Cell Cycle                        |
| SP-600125                                     | -2.02        | 0.51 | -0.64        | 0.37 | -1.38        | 0.19 | Selective JNK inhibitor                                              | Immune Response                   |
| PI-103                                        | -3.01        | 0.22 | -1.73        | 0.34 | -1.28        | 0.15 | multi-targeted PI3K inhibitor for p110 $\alpha$ / $\beta$ / $\gamma$ | Proliferation & Differentiation   |
| HDS 029                                       | -2.38        | 0.37 | -1.15        | 0.40 | -1.23        | 0.18 | ErbB receptor family inhibitor                                       | Cellular Regulation               |
| Akt 1/2 Kinase inhibitor                      | -2.73        | 0.28 | -1.54        | 0.28 | -1.19        | 0.13 | Akt 1/2 Kinase Inhibitor                                             | Proliferation & Differentiation   |
| ZM 306416 hydrochloride                       | -2.17        | 0.42 | -1.01        | 0.38 | -1.15        | 0.18 | VEGF receptor tyrosine kinase inhibitor                              | Proliferation & Differentiation   |
| SB 218078                                     | -2.77        | 0.35 | -1.65        | 0.28 | -1.12        | 0.14 | Chk1 inhibitor                                                       | Cell Cycle                        |
| TCS JNK 5a                                    | -2.74        | 0.30 | -1.74        | 0.59 | -1.00        | 0.25 | JNK 2/3 inhibitor                                                    | Immune Response                   |
| Lestaurtinib                                  | -3.03        | 0.40 | -2.11        | 0.26 | -0.92        | 0.14 | JAK2, FLT3 and TrkA inhibitor                                        | Immune Response                   |
| JNJ-10198409                                  | -2.09        | 0.66 | -1.22        | 0.59 | -0.87        | 0.28 | PDGF-RTK inhibitor                                                   | Proliferation & Differentiation   |
| PKC-412                                       | -2.50        | 0.30 | -1.72        | 0.21 | -0.78        | 0.11 | Multi-targeted kinase inhibitor                                      | General Poison                    |
| EKI-785, CL-387,785                           | -2.39        | 0.55 | -1.63        | 0.46 | -0.76        | 0.22 | EGFR inhibitor                                                       | Cellular Regulation               |
| K-252a                                        | -2.58        | 0.47 | -1.84        | 0.24 | -0.74        | 0.15 | Multi-targeted kinase inhibitor                                      | General Poison                    |
| PIK 90                                        | -2.40        | 0.35 | -1.82        | 0.30 | -0.58        | 0.15 | PI3K $\alpha$ / $\gamma$ / $\delta$ inhibitor                        | Proliferation & Differentiation   |
| <b>Toeris Panel</b>                           |              |      |              |      |              |      |                                                                      |                                   |
| DIPPA hydrochloride                           | -5.52        | 2.63 | 0.49         | 0.50 | -6.02        | 0.58 | Selective irreversible $\kappa$ antagonist                           | Neuromodulators                   |
| ARP 101                                       | -5.59        | 2.10 | -0.31        | 0.60 | -5.28        | 0.50 | Inhibitor of MMP-2                                                   | Cellular regulation & physiology  |
| NNC 05-2090                                   | -4.05        | 1.22 | -0.02        | 0.46 | -4.03        | 0.32 | GABA uptake inhibitor                                                | Neuromodulators                   |
| ICI-118,551                                   | -3.58        | 1.30 | 0.33         | 0.30 | -3.91        | 0.30 | $\beta$ 2 antagonist/inverse agonist                                 | Cellular regulation & physiology  |
| JLK 6                                         | -4.74        | 1.58 | -0.85        | 0.40 | -3.89        | 0.37 | Inhibitor of $\gamma$ -secretase-mediated $\beta$ APP processing     | Cellular regulation & physiology  |
| WAY 629 hydrochloride                         | -4.18        | 1.78 | -0.43        | 0.58 | -3.75        | 0.44 | Selective 5-HT2C agonist                                             | Neuromodulators                   |
| (S)-(-)-Propranolol hydrochloride             | -3.18        | 1.05 | 0.47         | 0.21 | -3.65        | 0.23 | $\beta$ antagonist                                                   | Cellular regulation & physiology  |
| (-)-U-50488 hydrochloride                     | -3.60        | 3.26 | -0.19        | 0.20 | -3.41        | 0.68 | Standard selective $\kappa$ agonist                                  | Neuromodulators                   |
| CGS 12066B dimaleate                          | -3.25        | 1.26 | -0.29        | 0.25 | -2.96        | 0.28 | 5-HT1B agonist                                                       | Cellular regulation & physiology  |
| Amthamine dihydrobromide                      | -2.94        | 1.38 | -0.39        | 0.29 | -2.55        | 0.31 | Highly selective standard H2 agonist                                 | Immune Response                   |
| Evans Blue tetrasodium salt                   | -2.29        | 1.09 | 0.24         | 0.15 | -2.53        | 0.23 | inhibitor of L-glutamate uptake                                      | Cellular regulation & physiology  |
| Naltrindole hydrochloride                     | -2.86        | 1.32 | -0.34        | 0.47 | -2.52        | 0.34 | Selective non-peptide $\delta$ antagonist                            | Cellular regulation & physiology  |
| Physostigmine hemisulfate                     | -3.35        | 0.37 | -0.84        | 0.35 | -2.52        | 0.17 | Cholinesterase inhibitor                                             | Neuromodulators                   |
| Fenretinide                                   | -2.22        | 1.19 | 0.15         | 0.58 | -2.37        | 0.34 | Synthetic retinoid and antiproliferative                             | Proliferation and differentiation |
| Cordycepin                                    | -2.36        | 0.34 | -0.18        | 0.26 | -2.18        | 0.13 | RNA synthesis inhibitor                                              | Transcription and translation     |
| PHITPP                                        | -2.67        | 1.02 | -1.01        | 0.58 | -1.66        | 0.32 | Selective ER $\beta$ antagonist                                      | Cellular regulation & physiology  |
| Deguelin                                      | -2.02        | 1.09 | -0.50        | 0.34 | -1.52        | 0.27 | Multi-target inhibitor including PI3K                                | Proliferation and differentiation |
| GF 109203X                                    | -2.54        | 0.48 | -1.10        | 0.49 | -1.44        | 0.23 | Protein kinase C inhibitor                                           | Cellular regulation & physiology  |
| Acylovir                                      | -2.03        | 0.72 | -0.65        | 0.42 | -1.38        | 0.23 | Inhibits viral DNA polymerase                                        | Anti-viral/parasitic              |
| PNU 120596                                    | -2.34        | 0.75 | -1.05        | 0.27 | -1.29        | 0.19 | Positive allosteric modulator of $\alpha$ 7 nAChR                    | Neuromodulators                   |
| N-Acetyl-N-acetoxy-4-chlorobenzenesulfonamide | -2.71        | 1.29 | -1.54        | 0.49 | -1.17        | 0.34 | Inhibitor of aldehyde dehydrogenase                                  | Cellular regulation & physiology  |
| RITA                                          | -2.40        | 1.67 | -1.24        | 0.52 | -1.16        | 0.41 | MDM2-p53 interaction inhibitor                                       | Transcription and translation     |
| NNC 55-0396 dihydrochloride                   | -2.31        | 0.76 | -1.18        | 0.70 | -1.13        | 0.33 | Inhibitor of T-type calcium channels                                 | Neuromodulators                   |
| Caffeic acid phenethyl ester                  | -2.40        | 0.74 | -1.39        | 0.45 | -1.01        | 0.24 | Specific inhibitor of NF- $\kappa$ B activation                      | Immune Response                   |
| CD 1530                                       | -2.05        | 0.40 | -1.17        | 0.64 | -0.88        | 0.28 | Potent and selective RAR $\gamma$ agonist                            | Transcription and translation     |
| BMS 191011                                    | -2.76        | 0.61 | -1.89        | 0.42 | -0.86        | 0.21 | Potent BKCa channel opener                                           | Cellular regulation & physiology  |
| Ceramide                                      | -2.21        | 0.58 | -1.47        | 0.56 | -0.74        | 0.26 | Ser/Thr protein phosphatase activator                                | Cellular regulation & physiology  |

**Supplementary Table 4: Compounds with preferential activity against HPV-negative cell lines**

| Compound                                   | HPV-Positive |      | HPV-Negative |      | Difference   |      | Primary mechanism of action                               | Category                          |
|--------------------------------------------|--------------|------|--------------|------|--------------|------|-----------------------------------------------------------|-----------------------------------|
|                                            | Mean B score | SEM  | Mean B score | SEM  | Mean B score | SEM  |                                                           |                                   |
| <b>Kinase inhibitor Panel</b>              |              |      |              |      |              |      |                                                           |                                   |
| Ryuvidine                                  | -0.003       | 1.31 | -3.08        | 0.58 | 3.08         | 0.36 | SETD8 and CDK4 inhibitor                                  | Cell Cycle                        |
| SB-505124 hydrochloride hydrate            | -0.38        | 0.52 | -2.54        | 0.82 | 2.16         | 0.36 | ALK 4/5/7 inhibitor                                       | Proliferation & Differentiation   |
| FAK Inhibitor 14                           | -1.03        | 0.83 | -2.87        | 0.50 | 1.84         | 0.28 | FAK inhibitor                                             | Proliferation & Differentiation   |
| NSC 663284                                 | -0.73        | 0.42 | -2.43        | 0.52 | 1.69         | 0.23 | CDC 25 phosphatase inhibitor                              | Cell Cycle                        |
| BI 78D3                                    | -1.52        | 1.32 | -3.18        | 0.84 | 1.66         | 0.44 | JNK inhibitor                                             | Immune Response                   |
| PHA 767491 hydrochloride                   | -1.35        | 0.51 | -2.02        | 0.34 | 0.67         | 0.18 | Cdc7/CDK9                                                 | Cell Cycle                        |
| <b>Toocris Panel</b>                       |              |      |              |      |              |      |                                                           |                                   |
| BTS 54-505                                 | -1.66        | 1.90 | -10.29       | 1.28 | 8.63         | 0.66 | Potent serotonin and noradrenalin reuptake inhibitor      | Neuromodulators                   |
| Paxilline                                  | -0.73        | 1.85 | -8.76        | 1.20 | 8.03         | 0.63 | Potassium channel blocker; cellular toxin                 | General Poison                    |
| N-ArachidonylGABA                          | 0.32         | 1.51 | -6.17        | 1.32 | 6.49         | 0.63 | Various cell signalling pathways                          | Neuromodulators                   |
| Roxindole hydrochloride                    | 0.41         | 1.04 | -5.27        | 1.15 | 5.68         | 0.52 | Dopamine D2 autoreceptor agonist                          | Neuromodulators                   |
| N-Acetyltryptamine                         | -0.68        | 1.36 | -6.33        | 1.00 | 5.65         | 0.50 | Mixed agonist-antagonist at melatonin receptors           | Neuromodulators                   |
| Y-26763                                    | -1.68        | 0.38 | -6.68        | 1.07 | 5.00         | 0.45 | KATP channel opener                                       | Cellular regulation & physiology  |
| Scopolamine hydrobromide                   | 1.69         | 0.65 | -2.92        | 1.02 | 4.61         | 0.44 | Muscarinic receptor antagonist                            | Neuromodulators                   |
| D-AP7                                      | -1.79        | 0.62 | -6.28        | 0.73 | 4.49         | 0.33 | Specific NMDA antagonist                                  | Cellular regulation & physiology  |
| BADGE                                      | 0.94         | 0.52 | -3.15        | 1.38 | 4.09         | 0.58 | PPAR $\gamma$ antagonist                                  | Cellular regulation & physiology  |
| Tacrine hydrochloride                      | -0.74        | 0.48 | -4.43        | 1.47 | 3.69         | 0.62 | Cholinesterase inhibitor                                  | Neuromodulators                   |
| SKF 96365 hydrochloride                    | -1.67        | 1.52 | -5.19        | 0.91 | 3.52         | 0.49 | TRPC channel blocker                                      | Cellular regulation & physiology  |
| Olvamil                                    | -0.57        | 0.70 | -3.47        | 0.37 | 2.90         | 0.21 | Vanilloid receptor agonist                                | Cellular regulation & physiology  |
| (R)-(+)-HA-966                             | -0.46        | 0.89 | -3.31        | 0.51 | 2.85         | 0.28 | NMDA partial agonist/antagonist                           | Neuromodulators                   |
| (S)-SNAP 5114                              | 0.63         | 0.76 | -2.14        | 0.29 | 2.76         | 0.20 | GABA uptake inhibitor                                     | Neuromodulators                   |
| 2-Methyl-5-hydroxytryptamine hydrochloride | -0.52        | 0.54 | -3.02        | 0.53 | 2.51         | 0.25 | 5-HT <sub>3</sub> agonist/potent 5-HT <sub>6</sub> ligand | Neuromodulators                   |
| 5,7-Dichlorokynurenic acid                 | -0.34        | 0.74 | -2.84        | 0.40 | 2.50         | 0.23 | Potent NMDA antagonist                                    | Neuromodulators                   |
| Embelin                                    | 0.11         | 1.32 | -2.37        | 0.68 | 2.48         | 0.39 | Inhibitor of X-linked inhibitor of apoptosis (XIAP)       | Cellular regulation & physiology  |
| Ivermectin                                 | -0.98        | 0.89 | -3.25        | 0.82 | 2.27         | 0.39 | Allosteric modulator of $\alpha$ 7 nicotinic receptors    | Anti-viral/parasitic              |
| Tomoxetine hydrochloride                   | -0.22        | 0.35 | -2.32        | 1.14 | 2.11         | 0.48 | Selective noradrenalin reuptake inhibitor                 | Neuromodulators                   |
| GR 127935 hydrochloride                    | -0.29        | 1.02 | -2.38        | 0.75 | 2.09         | 0.38 | 5-HT <sub>1B/1D</sub> antagonist                          | Cellular regulation & physiology  |
| Demethylasterriquinone B1                  | -0.15        | 0.53 | -2.16        | 0.78 | 2.01         | 0.34 | Selective insulin RTK activator                           | Cellular regulation & physiology  |
| Tyrphostin B44, (+) enantiomer             | -0.16        | 0.61 | -2.16        | 0.47 | 2.00         | 0.23 | EGFR-kinase inhibitor                                     | Cellular regulation & physiology  |
| PD 102807                                  | -0.33        | 0.50 | -2.29        | 0.37 | 1.97         | 0.18 | Selective M4 antagonist                                   | Neuromodulators                   |
| Ro 90-7501                                 | -0.74        | 1.02 | -2.69        | 1.21 | 1.95         | 0.54 | Inhibitor of A $\beta$ 42 fibril formation                | Cellular regulation & physiology  |
| Aminopurvalanol A                          | -1.92        | 1.08 | -3.66        | 0.48 | 1.74         | 0.30 | Cyclin-dependent kinase inhibitor                         | Proliferation and differentiation |
| Gossypol                                   | -0.62        | 1.16 | -2.19        | 0.72 | 1.57         | 0.38 | Proapoptotic; downregulates Bcl-2 and Bcl-XL              | General Poison                    |
| PALDA                                      | -0.91        | 0.92 | -2.15        | 0.64 | 1.24         | 0.33 | Endogenous lipid affecting TRPV1 receptors                | Cellular regulation & physiology  |
| OLDA                                       | -1.97        | 0.45 | -2.98        | 0.73 | 1.00         | 0.32 | TRPV1 agonist                                             | Cellular regulation & physiology  |

**Supplementary Table 5: Source, HPV status and growth media of cell lines in the high-throughput study (HTS) and dose-response validation studies (DRVS)**

| Cell line   | HPV status | Source   | Study      | Media    |
|-------------|------------|----------|------------|----------|
| HMS-001     | Positive   | Rocco    | HTS & DRVS | DMEM/F12 |
| UM-SCC47    | Positive   | Carey    | HTS & DRVS | DMEM/F12 |
| 93-VU-147T  | Positive   | deWinter | HTS & DRVS | DMEM/F12 |
| UPCI:SCC090 | Positive   | Gollin   | HTS & DRVS | DMEM/F12 |
| UPCI:SCC154 | Positive   | Gollin   | HTS & DRVS | DMEM/F12 |
| UD-SCC2     | Positive   | Rocco    | HTS & DRVS | DMEM/F12 |
| UWO37       | Positive   | In House | DRVS       | DMEM/F12 |
| UWO23       | Positive   | In House | DRVS       | DMEM/F12 |
| SCC9        | Negative   | ATCC     | HTS        | DMEM/F12 |
| FaDu        | Negative   | ATCC     | HTS        | DMEM/F12 |
| Detroit 562 | Negative   | ATCC     | HTS & DRVS | DMEM/F12 |
| SCC15       | Negative   | ATCC     | HTS & DRVS | DMEM/F12 |
| SCC4        | Negative   | ATCC     | HTS        | DMEM/F12 |
| SCC25       | Negative   | ATCC     | HTS & DRVS | DMEM/F12 |
| Cal 27      | Negative   | ATCC     | HTS & DRVS | DMEM/F12 |
| HSC2        | Negative   | JHSF     | HTS & DRVS | DMEM/F12 |
| JHU011      | Negative   | Rocco    | HTS & DRVS | DMEM/F12 |
| Cal33       | Negative   | DSMZ     | HTS & DRVS | DMEM     |
| JHU029      | Negative   | Rocco    | HTS & DRVS | DMEM/F12 |
| PCI 6B      | Negative   | Ferris   | HTS & DRVS | DMEM/F12 |
| PCI 13      | Negative   | Ferris   | HTS        | DMEM/F12 |
| PCI 22B     | Negative   | Ferris   | HTS        | DMEM/F12 |
| PCI 6A      | Negative   | Ferris   | HTS        | DMEM/F12 |
| RF 15A      | Negative   | Ferris   | HTS & DRVS | DMEM/F12 |
| RF 15B      | Negative   | Ferris   | HTS        | DMEM/F12 |
| RF 22A      | Negative   | Ferris   | HTS        | DMEM/F12 |
| RF 37B      | Negative   | Ferris   | HTS & DRVS | DMEM/F12 |
| JHU 006     | Negative   | Rocco    | HTS        | DMEM/F12 |

**Legend:** HPV – human papillomavirus; HTS – High-throughput study; DRVS – Dose-response studies; Rocco - Dr. James Rocco, Harvard Medical School; Carey - Dr. Tom Carey, University of Michigan; deWinter - Dr. Johann deWinter, Free University of Amsterdam; Gollin - Dr. Suzanne Gollin, University of Pittsburgh Cancer Institute; JHSF - Japan Health Sciences Foundation; DSMZ - Deutsche Sammlung von Mikroorganismen und Zellkulturen; Ferris - Dr. Robert Ferris, University of Pittsburgh Cancer Institute; In House; Developed in our laboratory at Western University.



**Supplementary Table 6: Short tandem repeat (STR) profiles of HNSCC cell line panel**

| Cell Line   | Amelogenin | CSF1PO | D13S317    | D16S539   | D5S818     | D7S820 | TH01   | TPOX   | vWA        | D18S51 | D19S433    | D21S11     | D2S1338    | D3S1358 | D8S1179 | FGA    |
|-------------|------------|--------|------------|-----------|------------|--------|--------|--------|------------|--------|------------|------------|------------|---------|---------|--------|
| 93-VU-147T  | X, Y       | 11, 11 | 8, 11      | 9, 12     | 11, 12     | 12, 12 | 6, 6   | 8, 8   | 17, 17     | 15, 20 | 12, 13     | 28, 29     | 21, 21     | 15, 15  | 12, 15  | 24, 24 |
| UD-SCC2     | X, Y       | 11, 12 | 8, 8       | 11, 13    | 10, 11     | 8, 9   | 8, 9   | 8, 10  | 18, 18     | ND     | ND         | 30, 31.2   | ND         | ND      | ND      | ND     |
| HMS001      | X, Y       | 11, 11 | 8, 8       | 9, 12     | 11, 12     | 12, 12 | 6, 6   | 8, 8   | 17, 17     | 15, 20 | 13, 14     | 28, 29     | 21, 21     | 15, 15  | 13, 15  | 24, 24 |
| UM-SCC47    | X, Y       | 11, 13 | 8, 11      | 8, 13     | 11, 12     | 11, 11 | 7, 9.3 | 10, 11 | 18, 18     | 18, 18 | 14, 15     | 29, 30     | 25, 25     | 15, 15  | 15, 15  | 25, 25 |
| UPCI-SCC090 | X, Y       | 11, 12 | 11, 11     | 12, 13    | 11, 12     | 9, 10  | 7, 7   | 8, 8   | 17, 17     | 14, 18 | 12, 13     | 39, 31     | 22, 22     | 14, 14  | 12, 12  | 20, 20 |
| UPCI-SCC154 | X, Y       | 10, 12 | 9, 12      | 13, 13    | 11, 12     | 9, 10  | 7, 7   | 8, 9   | 17, 17     | 15, 15 | 15.2, 16   | 28, 29     | 25, 25     | 16, 16  | 12, 12  | 20, 24 |
| Cal27       | X, X       | 10, 12 | 10, 11     | 11, 12    | 11, 12     | 10, 10 | 6, 9.3 | 8, 8   | 14, 17     | 13, 13 | 14, 15.2   | 28, 29     | 23, 24     | 16, 16  | 13, 15  | 25, 25 |
| Detroit 562 | X, X       | 11, 13 | 12, 12     | 11, 11    | 11, 12     | 8, 10  | 8, 9   | 8, 10  | 16, 16     | 15, 15 | 14, 14     | 28, 30     | 25, 25     | 15, 16  | 13, 13  | 21, 21 |
| FaDu        | ----       | 12, 12 | 8, 9       | 11, 11    | 12, 12     | 11, 12 | 8, 8   | 11, 11 | 15, 17, 18 | 16, 16 | 14, 16     | 31.2, 31.2 | 19, 19     | 17, 18  | 13, 13  | 25, 25 |
| SCC-4       | X, Y       | 11, 11 | 11, 13     | 12, 12    | 13, 13     | 9, 11  | 9.3    | 8, 8   | 15, 17     | 15, 15 | 12, 14     | 32.2, 32.2 | 16, 24     | 18, 18  | 14, 14  | 21, 22 |
| SCC-9       | X, Y       | 11, 11 | 9, 9       | 10, 11    | 12, 12     | 8, 8   | 8, 9   | 9, 11  | 17, 17     | 12, 14 | 12, 14     | 28, 28     | 19, 21     | 15, 15  | 13, 13  | 20, 25 |
| SCC-15      | X, Y       | 10, 13 | 9, 14      | 12, 15    | 12, 12     | 10, 11 | 9, 9.3 | 8, 8   | 15, 17     | 16, 16 | 12, 15     | 30, 30     | 16, 23     | 16, 16  | 10, 13  | 24, 24 |
| SCC-25      | X, X       | 10, 10 | 13, 13     | 11, 12    | 12, 12     | 12, 12 | 8, 8   | 8, 12  | 17, 19     | 16, 16 | 13, 14     | 30, 30     | 17, 19     | 17, 17  | 13, 13  | 20, 24 |
| Cal33       | X, Y       | 11, 12 | 8, 13      | 11, 11    | 11, 12     | 8, 10  | 9, 9.3 | 8, 8   | 17, 17     | 14, 14 | 14, 15.2   | 29, 30     | 20, 25     | 17, 17  | 13, 13  | 21, 22 |
| HSC2        | X, Y       | 12, 13 | 11, 12     | 12, 12    | 10, 12     | 9, 12  | 6, 7   | 8, 8   | 16, 18     | ND     | ND         | 31.2, 31.2 | ND         | ND      | ND      | ND     |
| JHU006      | X, Y       | 10, 10 | 11, 11     | 12, 12    | 12, 12     | 9, 10  | 6, 6   | 8, 8   | 14, 16     | 16, 16 | 14, 14.2   | 31, 31     | 17, 25     | 13, 13  | 13, 14  | 19, 19 |
| JHU011      | X, X       | 10, 12 | 12, 12     | 9, 14     | 9, 12      | 11, 11 | 6, 9   | 8, 9   | 16, 17     | 13, 15 | 13, 14     | 31, 31     | 17, 26     | 18, 18  | 13, 13  | 23, 23 |
| JHU029      | X, Y       | 8, 12  | 12, 13     | 10, 13    | 13, 15     | 10, 11 | 8, 8   | 9, 11  | 15, 15     | 15, 15 | 13, 13     | 33.2, 33.2 | 19, 26     | 16, 16  | 14, 14  | 22, 25 |
| PCI6A       | X, X       | 12, 12 | 9, 11      | 11, 11    | 11, 12     | 8, 12  | 6, 6   | 11, 11 | 15, 18     | 12, 17 | 15, 16.2   | 31.2, 31.2 | 17, 24     | 18, 18  | 14, 14  | 23, 23 |
| PCI6B       | X, Y       | 10, 11 | 10, 11     | 12, 13    | 12, 12     | 12, 13 | 6, 7   | 8, 9   | 16, 18     | 16, 16 | 12, 14     | 32.2, 32.2 | 23, 24     | 18, 18  | 13, 14  | 20, 20 |
| PCI13       | X, X       | 10, 14 | 10, 11     | 11, 11    | 11, 14     | 11, 12 | 9, 9.3 | 6, 8   | 13, 17     | 16, 16 | 13, 15.2   | 29, 30     | 24, 24     | 14, 14  | 12, 13  | 22, 22 |
| PCI30       | X, Y       | 10, 10 | 13, 13     | 12, 13    | 11, 11     | 10, 12 | 6, 6   | 10, 11 | 14, 17     | 12, 15 | 12, 12     | 30, 32.2   | 18, 18     | 15, 15  | 13, 15  | 21, 21 |
| RF15A       | X, X       | 10, 12 | 12, 12     | 9, 9      | 10, 12     | 10, 11 | 6, 6   | 8, 11  | 17, 17     | 16, 18 | 13, 14     | 29, 29     | 20, 23     | 16, 16  | 14, 14  | 22, 22 |
| RF15B       | X, Y       | 11, 11 | 11, 11     | 11, 11    | 11, 11     | 11, 11 | 6, 6   | 8, 8   | 18, 18     | 14, 14 | 14, 15.2   | 28, 28     | 20, 25     | 16, 16  | 14, 14  | 23, 23 |
| RF22A       | X, X       | 10, 10 | 8, 12      | 9, 11     | 12, 12     | 8, 9   | 6, 6   | 8, 11  | 15, 18     | 18, 18 | 14, 15     | 28, 28     | 17, 20     | 16, 16  | 11, 13  | 22, 24 |
| RF22B       | X, X       | 10, 12 | 8, 11, 12  | 9, 12, 13 | 10, 12, 13 | 9-12   | 6, 6   | 8, 11  | 15-18      | 16, 18 | 12, 13, 14 | 27, 29     | 20, 22, 23 | 16, 18  | 13-16   | 18, 22 |
| RF37A       | X, X       | 11, 11 | 10, 13, 14 | 11, 14    | 11, 11     | 7, 10  | 7, 9.3 | 8, 11  | 16, 17     | 13, 13 | 15, 16     | 30, 32.2   | 24, 24     | 17, 17  | 11, 13  | 21, 21 |
| RF37B       | X, X       | 10, 12 | 12, 12     | 9, 9      | 10, 12     | 10, 11 | 6, 6   | 8, 11  | 17, 17     | 16, 18 | 13, 14     | 29, 29     | 20, 23     | 16, 16  | 14, 14  | 22, 22 |
| SCC61       | X, Y       | 10, 12 | 10, 12     | 9, 11     | 12, 13     | 8, 12  | 7, 9   | 8, 8   | 16, 17     | ND     | ND         | 28, 30     | ND         | ND      | ND      | ND     |
| BICR56      | X, X       | 12, 12 | 12, 12     | 11, 11    | 11, 12     | 8, 12  | 9, 9.3 | 8, 9   | 15, 16     | 14, 17 | 14, 15     | 28, 29     | 24, 26     | 14, 14  | 11, 13  | 21, 21 |
| PE/CA-PJ49  | X, X       | 11, 12 | 8, 11      | 11, 11    | 8, 12      | 8, 9   | 6, 10  | 8, 8   | 16, 19     | 24, 24 | 14, 14     | 32, 32     | 17, 18     | 16, 16  | 10, 11  | 20, 20 |

ND: not determined.
